# Supplementary material for: Generation of macrophages with altered viral sensitivity from genome-edited rhesus macaque iPSCs to model human disease
Source: PubMed Central journal article supplement (PMC8039773; doi:10.1016/j.omtm.2021.03.008), 2021-03-17
Supplement: mmc1.pdf [file mmc1.pdf]

**OMTM, Volume 21**

**Supplemental information**

**Generation of macrophages with altered  
viral sensitivity from genome-edited rhesus  
macaque iPSCs to model human disease**

**Yoshihiro Iwamoto, Yohei Seki, Kahoru Taya, Masahiro Tanaka, Shoichi Iriguchi, Yasuyuki Miyake, Emi E. Nakayama, Tomoyuki Miura, Tatsuo Shioda, Hirofumi Akari, Akifumi Takaori-Kondo, and Shin Kaneko**

**Figure S1**

**a**

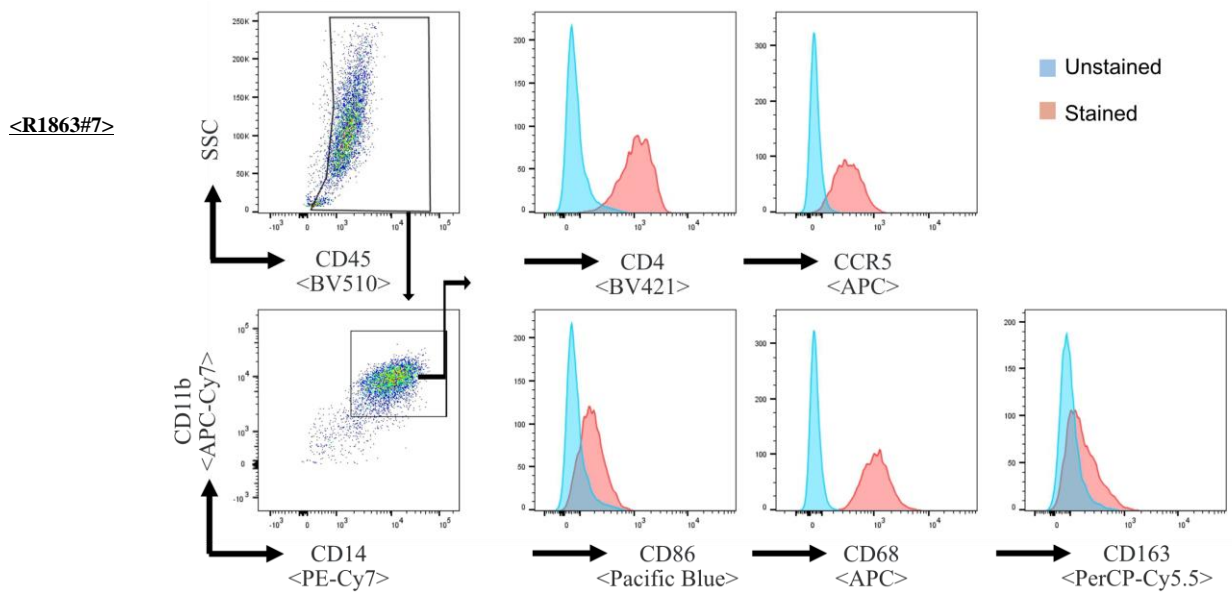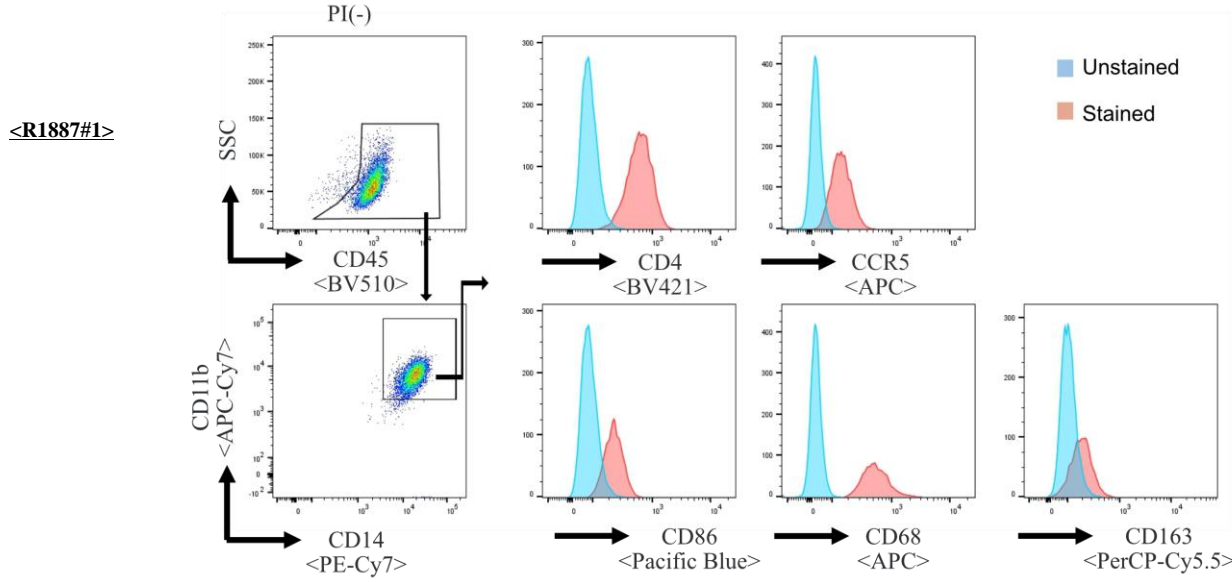

**b**

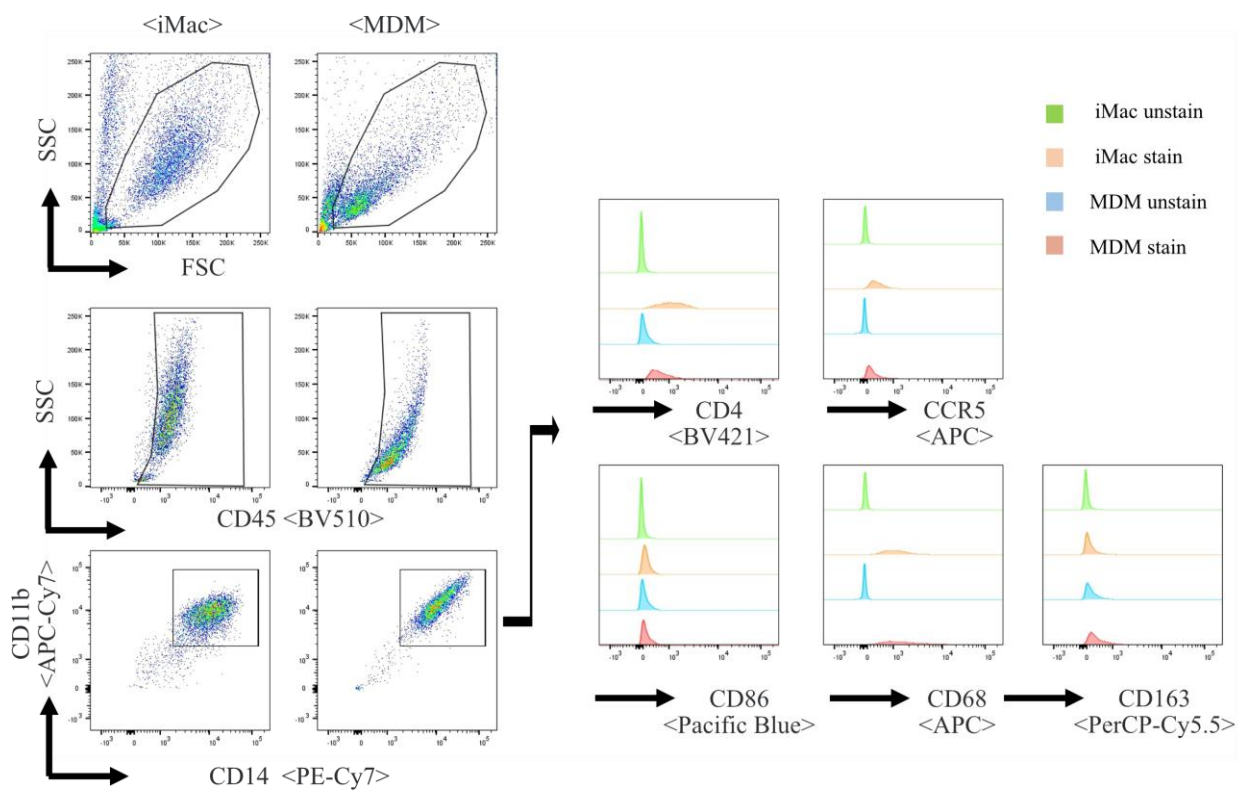

**Figure S1 Flow-cytometric analysis of the macrophage differentiated from Rh-iPSC**

(a) Flow-cytometric analysis of the macrophage generated from other Rh-iPSC clones phenotypes 34 days after the differentiation.

(b) Flow-cytometric analysis of macrophage-marker expression in macrophages generated from Rh-iPSCs and monocytes (MDM).

**Table S1**

Results of CRISPR/Cas9 genome editing by using Cas9 and gRNA expression plasmid (Exp1,2) or Cas9 protein and sgRNA(Exp3,4)

|                                        | Efficacy of genome editing |
|----------------------------------------|----------------------------|
| Exp1: Cas9 and gRNA expression plasmid | 0%                         |
| Exp2: Cas9 and gRNA expression plasmid | 0%                         |
| Exp3: Cas9 protein and sgRNA           | 29.1%                      |
| Exp4: Cas9 protein and sgRNA           | 40%                        |
